# Instructions for Obtaining ANESTHESIOLOGY Continuing Medical Education (CME) Credit

CME Editors: Leslie C. Jameson, M.D., and Dan J. Kopacz, M.D.

ANESTHESIOLOGY's Journal CME is open to all readers. To take part in ANESTHESIOLOGY Journal-based CME, complete the following steps:

1. Read the CME information presented on this page.
2. Read this month's article designated for CME credit (listed on the right) in either the print or online edition.
3. Register at <http://education.asahq.org/2015-journal-cme>. Nonmembers will be asked to provide payment.
4. Achieve a score of at least 50% correct on the six-question online journal CME quiz and complete the evaluation.
5. Claim credit in 15-minute increments, for a maximum of 1 *AMA PRA Category 1 Credit™* per journal article.

## CME Information & Disclosure

**Purpose:** The focus of ANESTHESIOLOGY Journal-based CME is to educate readers on current developments in the science and clinical practice of anesthesiology.

**Target Audience:** ANESTHESIOLOGY Journal-based CME is intended for anesthesiologists. Researchers and other health care professionals with an interest in anesthesiology may also participate.

**Accreditation:** The American Society of Anesthesiologists is accredited by the Accreditation Council for Continuing Medical Education to provide continuing medical education for physicians.

**CME Designation Statement:** The American Society of Anesthesiologists designates this Journal-based CME activity for a maximum of 1 *AMA PRA Category 1 Credit™*. Physicians should claim only the credit commensurate with the extent of their participation in the activity.

## Rates

Two options are available:

|            | ASA Member | Non-member |
|------------|------------|------------|
| Annual Fee | \$0        | \$120      |
| Per Issue  | \$0        | \$20       |

Payment may be made using Visa or MasterCard.

Please direct any questions about Journal-based CME to: [EducationCenter@asahq.org](mailto:EducationCenter@asahq.org)

**Date of Release: September 2015**

**Termination Date: September 2018**

## This Month's ANESTHESIOLOGY Journal-based CME Article

Read the article by Lobo *et al.* entitled "A Phase 1, Dose-escalation, Double-blind, Block-randomized, Controlled Trial of Safety and Efficacy of Neosaxitoxin Alone and in Combination with 0.2% Bupivacaine, with and without Epinephrine, for Cutaneous Anesthesia" on page 873 and the accompanying editorial by Lahaye and Butterworth

entitled "Site-1 Sodium Channel Blockers as Local Anesthetics: Will Neosaxitoxin Supplant the Need for Continuous Nerve Blocks?" on page 741 of this issue.

## Learning Objectives

After successfully completing this activity, the learner will be able to recognize the mechanism of action of neosaxitoxin, predict the type of adverse effects and the dose range at which they may develop after subcutaneous neosaxitoxin injection, and describe the effects of adding epinephrine to bupivacaine–neosaxitoxin solutions.

## Disclosures

**Editor-in-Chief:** James C. Eisenach, M.D., receives consulting fees from Aerial BioPharma LLC and Cubist Pharmaceuticals, Inc.

**CME Editors:** Leslie C. Jameson, M.D., receives honoraria from GE Medical International and Masimo Corporation. Dan J. Kopacz, M.D., has an equity position in SoloDex, LLC.

**Authors:** Charles B. Berde, M.D., Ph.D., (and Daniel Kohane, M.D., Gary Strichartz, M.D., and Robert Langer, M.D.) holds patents on site-1 blockers, including Neosaxitoxin, for prolonged duration local anesthesia. Dr. Berde is Investigational New Drug holder for Neosaxitoxin. Boston Children's Hospital, Boston, Massachusetts has a collaboration agreement with Proteus S.A., Santiago, Chile for commercial development of Neosaxitoxin. Kimberly Lobo, M.S., M.P.H., Carolina Donado, M.D., Laura Cornelissen, Ph.D., Joseph Kim, M.A., Rebeca Ortiz, B.A., Roy W. A. Peake, Ph.D., Mark Kellogg, Ph.D., Mark E. Alexander, M.D., David Zurakowski, Ph.D., Katherine E. Kurgansky, M.P.H., James Peyton, M.B.Ch.B., Aykut Bilge, M.D., Ph.D., Karen Boretsky, M.D., Mary Ellen McCann, M.D., M.P.H., and Joseph Cravero, M.D. have reported no financial relationships with commercial interests.

**Author:** Laura A. Lahaye, M.D., and John F. Butterworth IV, M.D., have reported no financial relationships with commercial interests.

**ASA Staff:** Kari L. Lee, Editorial Manager, has reported no financial relationships with commercial interests. Ginger Clark, Editor, has an equity position in Merck & Co.

## Resolution of Conflicts of Interest

In accordance with the ACCME Standards for Commercial Support of CME, the American Society of Anesthesiologists has implemented mechanisms, prior to the planning and implementation of this Journal-based CME activity, to identify and resolve conflicts of interest for all individuals in a position to control content of this Journal-based CME activity.

## Disclaimer

The information provided in this CME activity is for continuing education purposes only and is not meant to substitute for the independent medical judgment of a health care provider relative to diagnostic and treatment options of a specific patient's medical condition.
